# Supplementary material for: Behavioural Determinants of Hand Washing and Glove Recontamination before Aseptic Procedures at Birth: A Time-and-Motion Study and Survey in Zanzibar Labour Wards
Source: Int J Environ Res Public Health. 2020 Feb 24;17(4):1438. doi: 10.3390/ijerph17041438 (PMC7068290; doi:10.3390/ijerph17041438)
Supplement: Supplementary file 1 [file ijerph-17-01438-s001.pdf]

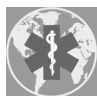

## Supplementary A – Sample size scenarios

Sample size scenarios were calculated in EpiInfo v7 using the Fleiss' formula with continuity correction. Cells BELOW the bold line fit within our sample size.

Number of opportunities for 5:1 unexposed to exposed ratio.

| 5:1                       | Effect size |       |      |      |      |      |     |     |
|---------------------------|-------------|-------|------|------|------|------|-----|-----|
| % of outcome in Unexposed | 1.1         | 1.3   | 1.5  | 1.8  | 2    | 2.5  | 3   | 5   |
| 3%                        | 191567      | 23213 | 9036 | 3920 | 2672 | 1365 | 864 | 309 |
| 5%                        | 112504      | 13617 | 5294 | 2291 | 1559 | 794  | 501 | 176 |
| 10%                       | 59820       | 6420  | 2487 | 1071 | 725  | 365  | 227 | 75  |
| 15%                       | 33450       | 4020  | 1552 | 663  | 447  | 222  | 136 | 41  |
| 40%                       | 8745        | 1022  | 381  | 153  | 98   |      |     |     |

\* Power at 80% and confidence intervals at 95%.

Number of opportunities for 2:1 unexposed to exposed ratio.

| 2:1                       | Effect size |       |      |      |      |     |     |     |
|---------------------------|-------------|-------|------|------|------|-----|-----|-----|
| % of outcome in Unexposed | 1.1         | 1.3   | 1.5  | 1.8  | 2    | 2.5 | 3   | 5   |
| 3%                        | 120483      | 14771 | 5810 | 2555 | 1755 | 912 | 587 | 216 |
| 5%                        | 70758       | 8660  | 3402 | 1493 | 1023 | 530 | 339 | 123 |
| 10%                       | 33450       | 4079  | 1595 | 695  | 474  | 243 | 153 | 53  |
| 15%                       | 21018       | 2552  | 993  | 429  | 291  | 147 | 92  | 29  |
| 40%                       | 5478        | 642   | 240  | 96   | 62   |     |     |     |

\*Power at 80% and confidence intervals at 95%.

Number of opportunities for 1:1 unexposed to exposed ratio.

| 1:1                       | Effect size |       |      |      |      |     |     |     |
|---------------------------|-------------|-------|------|------|------|-----|-----|-----|
| % of outcome in Unexposed | 1.1         | 1.3   | 1.5  | 1.8  | 2    | 2.5 | 3   | 5   |
| 3%                        | 107756      | 13350 | 5298 | 2356 | 1628 | 856 | 556 | 210 |
| 5%                        | 63364       | 7824  | 3100 | 1374 | 938  | 496 | 320 | 118 |
| 10%                       | 29900       | 4190  | 1452 | 144  | 438  | 226 | 155 | 50  |
| 15%                       | 18780       | 3002  | 902  | 110  | 268  | 136 | 84  | 26  |
| 40%                       | 4878        | 574   | 214  | 86   | 56   |     |     |     |

\*Power at 80% and confidence intervals at 95%.

## Supplementary B – Questionnaire

### Birth Attendant Questionnaire

#### Introduction

I am \_\_\_\_\_ from \_\_\_\_\_

#### Purpose of the study

- To assess how well hand washing is done in maternity units and at home.
- To understand when and why health care staff wash their hands when helping during child birth.
- To design a programme to improve hand washing by health care staff.

This project is in partnership with the Ministry of Health and your co-operation is very important to ensure its success and ultimately improve infection prevention practices in Zanzibar. All birth attendants across 10 high volume hospitals in Unguja and Pemba will be asked to participate.



| Respondent Information          |                                                                                           |                                                                                                                                                                                                                                                   |                                                     |
|---------------------------------|-------------------------------------------------------------------------------------------|---------------------------------------------------------------------------------------------------------------------------------------------------------------------------------------------------------------------------------------------------|-----------------------------------------------------|
| R1                              | Respondent code (ID)                                                                      | <input type="text"/> <input type="text"/>                                                                                                                                                                                                         |                                                     |
| R2A                             | Interviewer code (ID)                                                                     | <input type="text"/> <input type="text"/>                                                                                                                                                                                                         |                                                     |
| R2B                             | Facility code (ID)                                                                        | <input type="text"/> <input type="text"/>                                                                                                                                                                                                         |                                                     |
| R3                              | Date<br><b>Write the date in NUMBERS for day month year (DDMMYYYY)</b>                    | DATE<br><input type="text"/> <input type="text"/>                                                                                                                                                                                                 | MONTH<br><input type="text"/> <input type="text"/>  |
|                                 |                                                                                           | YEAR<br><input type="text"/> <input type="text"/> <input type="text"/> <input type="text"/>                                                                                                                                                       |                                                     |
| R4                              | Time<br><b>Write the start time using the 24 hour clock format e.g., 0815</b>             | <input type="text"/> <input type="text"/> <input type="text"/> <input type="text"/>                                                                                                                                                               |                                                     |
| R5A                             | What is your title?                                                                       | (1) Senior Nurse<br>(2) Nurse Midwife<br>(3) Public Health Nurse B (PHNB)<br>(4) Maternal and Child Health Aid (MCHA)<br>(5) Orderly<br>(6) Clinical officer<br>(7) Gynaecologist<br>(8) Assistant Medical Officer<br>(88) Other (Please specify) |                                                     |
| R5B                             | Are you the maternity in charge?                                                          | (1) Yes<br>(2) No                                                                                                                                                                                                                                 |                                                     |
| R6                              | How long is your service at this maternity ward (yrs/months)?:                            | Years<br><input type="text"/> <input type="text"/>                                                                                                                                                                                                | Months<br><input type="text"/> <input type="text"/> |
| R7                              | How many years of service since completing your latest formal training for this position? | If no training, put 99<br><input type="text"/> <input type="text"/>                                                                                                                                                                               |                                                     |
| R8                              | How old are you?                                                                          | <input type="text"/> <input type="text"/>                                                                                                                                                                                                         |                                                     |
| R9                              | To become a birth attendant, how many years in total did you spend in formal training?    | If no training, put 99<br><input type="text"/> <input type="text"/>                                                                                                                                                                               |                                                     |
| <b>Household characteristic</b> |                                                                                           |                                                                                                                                                                                                                                                   |                                                     |
| R10A                            | How many household members are 18-years old or younger?                                   | <input type="text"/> <input type="text"/>                                                                                                                                                                                                         |                                                     |
| R10B                            | Are all household members aged 6 to 18 currently students?                                | (1) Yes<br>(2) No<br>(3) No members ages 6 to 18                                                                                                                                                                                                  |                                                     |
| R10C                            | What is the main building material used for the walls of the main building of your house? | (1) Baked bricks<br>(2) Poles and mud, grass, sun-dried bricks, or other<br>(3) Stones, cement bricks, or timber                                                                                                                                  |                                                     |
| R10D                            | What is the main fuel used for cooking?                                                   | (1) Firewood, solar, gas (biogas), or wood residuals,                                                                                                                                                                                             |                                                     |

|                                                                                                                         |                                                                                                                                                                                                                                                  |                                                                                           |
|-------------------------------------------------------------------------------------------------------------------------|--------------------------------------------------------------------------------------------------------------------------------------------------------------------------------------------------------------------------------------------------|-------------------------------------------------------------------------------------------|
|                                                                                                                         |                                                                                                                                                                                                                                                  | (2) Charcoal, paraffin, gas (industrial), electricity, generator/private source, or other |
| R10E                                                                                                                    | Does your household have any televisions?                                                                                                                                                                                                        | (1) Yes<br>(2) No                                                                         |
| R10F                                                                                                                    | Does your household have any radios, cassette/tape recorders, or hi-fi systems?                                                                                                                                                                  | (1) Yes<br>(2) No                                                                         |
| R10G                                                                                                                    | Does your household have any lanterns?                                                                                                                                                                                                           | (1) Yes<br>(2) No                                                                         |
| R10H                                                                                                                    | Does your household have any tables?                                                                                                                                                                                                             | (1) Yes<br>(2) No                                                                         |
| R10I                                                                                                                    | In the last 12 months, has your nuclear family cultivated any crops?<br>Does your nuclear family own cattle?                                                                                                                                     | (1) No crops, and no cattle                                                               |
|                                                                                                                         |                                                                                                                                                                                                                                                  | (2) No crops, and yes cattle                                                              |
|                                                                                                                         |                                                                                                                                                                                                                                                  | (3) Yes crops, but no cattle                                                              |
|                                                                                                                         |                                                                                                                                                                                                                                                  | (4) Yes crops, and yes cattle                                                             |
| R10J                                                                                                                    | What is the main building material used for the roof of the main building?                                                                                                                                                                       | (1) Leaves (makuti), or other<br>(2) Iron sheets (tin)/asbestos, concrete, tiles          |
| <b>Training and supervision</b>                                                                                         |                                                                                                                                                                                                                                                  |                                                                                           |
| F1                                                                                                                      | Think about the last two weeks - how much time during a day does the maternity in charge spend in the delivery room?                                                                                                                             | (1) Less than half an hour                                                                |
|                                                                                                                         |                                                                                                                                                                                                                                                  | (2) Between 30 minutes and 2 hours                                                        |
|                                                                                                                         |                                                                                                                                                                                                                                                  | (3) More                                                                                  |
| F2                                                                                                                      | If there is an emergency during labour/delivery, who do you usually contact?                                                                                                                                                                     | (1) The maternity in-charge                                                               |
|                                                                                                                         |                                                                                                                                                                                                                                                  | (2) Another colleague or birth attendant                                                  |
|                                                                                                                         |                                                                                                                                                                                                                                                  | (3) Doctor on call                                                                        |
|                                                                                                                         |                                                                                                                                                                                                                                                  | (4) Other (please specify)                                                                |
| 3                                                                                                                       | Did you receive any refresher training including hand hygiene in the past 12 months?                                                                                                                                                             | (1) Yes<br>(2) No                                                                         |
| F4                                                                                                                      | Did you attend any supportive supervision session in the past three months?                                                                                                                                                                      | (1) Yes<br>(2) No                                                                         |
| I1B                                                                                                                     | A mother brings her 1 week old baby to the pediatric ward with a high fever. You examine the baby and discover the umbilical cord is infected – it is red and discharging pus. List all the possible causes that might have caused the infection | (1) Mentions hand hygiene of birth attendant                                              |
|                                                                                                                         |                                                                                                                                                                                                                                                  | 2) Does not mention hand hygiene of birth attendant                                       |
| Instructions: Encourage the respondent to identify as many sources as possible and to be <b>as specific as possible</b> |                                                                                                                                                                                                                                                  |                                                                                           |

Please remember that there are no good or bad answers, just the answers that best describe how you think and feel about these issues. The topic will be hand hygiene during delivery. When I ask you about hand hygiene I mean hand washing with water and soap or handrubbing with the appropriate duration and technique, drying.

| Experiential attitudes                                                       |                                         |     |                |
|------------------------------------------------------------------------------|-----------------------------------------|-----|----------------|
|                                                                              |                                         | No  | Yes – A little |
|                                                                              |                                         | (1) | (2)            |
| I am going to ask you some questions. Let's start with one easy to practice: |                                         |     |                |
| A1                                                                           | Do you feel <b>hungry</b> before lunch? |     |                |

|    |                                                                                                                                      |
|----|--------------------------------------------------------------------------------------------------------------------------------------|
|    | Do your hands feel <b>dry</b> when you wash your hands repeatedly?                                                                   |
| A2 | <i>Note for interviewers: repeatedly means you have washed your hands 40 times across 10 women in labour</i>                         |
| A3 | Do you feel like a <b>good nurse</b> when you wash your hands before a delivery?                                                     |
| A4 | Do you feel <b>anxious</b> (wasi wasi) when you do <b>not</b> wash your hands before a delivery?                                     |
| A5 | Do you feel <b>uncomfortable</b> when you put on gloves with wet hands?                                                              |
|    | <b>In a situation when you are working alone and there are multiple women to assist.</b>                                             |
| A6 | Do you feel <b>like you are wasting time/have insufficient time</b> (kupoteza muda wako) when you wash your hands before a delivery? |

| Instrumental attitudes |                                                                                                                                                                                                                                                                                                       |                 |                    |                                          |
|------------------------|-------------------------------------------------------------------------------------------------------------------------------------------------------------------------------------------------------------------------------------------------------------------------------------------------------|-----------------|--------------------|------------------------------------------|
| I1A                    | Among newborns born in healthcare facilities, some newborns develop an infection within 1 week from birth. Where do you think infections come from?                                                                                                                                                   | Home (1)        | Facility (2)       | Similar for both (3)                     |
|                        | <b>I am going to read you some statements, and I will ask you if you agree with them or not</b>                                                                                                                                                                                                       | Agree a lot (1) | Agree a little (2) | Disagree a little (3) Disagree a lot (4) |
| I2                     | Before a delivery, if a nurse forgets to wash her hands, <b>she will get an infection</b> . Do you agree or disagree? A little or a lot?                                                                                                                                                              |                 |                    |                                          |
| I3                     | Before a delivery, washing your hands will prevent the <b>newborn</b> from developing a serious infection. Do you agree or disagree? A little or a lot?                                                                                                                                               |                 |                    |                                          |
| I4                     | A newborn does not develop an infection if the birth attendant wears gloves but forgets to hand wash. Do you agree or disagree? A little or a lot?                                                                                                                                                    |                 |                    |                                          |
| I5                     | You are wearing <b>two layers</b> of gloves at the same time. After having assisted a delivery, <b>you have taken the top layer off</b> and you immediately perform another delivery. In this situation, your hands will cause the newborn an infection. Do you agree or disagree? A little or a lot? |                 |                    |                                          |

| Perceived control/Self-efficacy |                                                                                                                                                                                                             |                    |                        |                          |
|---------------------------------|-------------------------------------------------------------------------------------------------------------------------------------------------------------------------------------------------------------|--------------------|------------------------|--------------------------|
|                                 | <b>In some situations, nurses find it difficult to wash their hands with soap before a delivery. I am going to ask you questions about your ability to perform hand washing in difficult situations</b>     |                    |                        |                          |
|                                 |                                                                                                                                                                                                             | Very difficult (1) | A little difficult (2) | Not difficult at all (3) |
| C1                              | How sure are you that you will (can) wash hands before <b>every</b> delivery when <b>water is not flowing</b> from the sink?                                                                                |                    |                        |                          |
| C2                              | How sure are you that you will (can) wash hands before <b>every</b> delivery when <b>there is no disposable drying material</b> ?                                                                           |                    |                        |                          |
| C3                              | How sure are you that you will (can) wash hands before <b>every</b> delivery when <b>there is no birth attendant available to assist you</b> during delivery?                                               |                    |                        |                          |
| C4                              | How sure are you that you will (can) wash hands before <b>every</b> delivery <b>when a mother is rushed</b> into the ward just before delivery, and you can see the <b>newborn's head on the perineum</b> ? |                    |                        |                          |

| Social Influence and social norms |        |                 |                |
|-----------------------------------|--------|-----------------|----------------|
|                                   | No (1) | Yes usually (2) | Yes always (3) |

|                                                                                                                                                                                                                                                                                                        |                                                                                                                                                                         |                                         |                            |
|--------------------------------------------------------------------------------------------------------------------------------------------------------------------------------------------------------------------------------------------------------------------------------------------------------|-------------------------------------------------------------------------------------------------------------------------------------------------------------------------|-----------------------------------------|----------------------------|
| N1A                                                                                                                                                                                                                                                                                                    | Do you think <b>you should</b> (napasso) wash your hands before a delivery?                                                                                             |                                         |                            |
| <i>[We recently asked 10 birth attendants in Zanzibar that previous question]</i>                                                                                                                                                                                                                      |                                                                                                                                                                         |                                         |                            |
| N2A                                                                                                                                                                                                                                                                                                    | Out of these 10, how many birth attendants thought <b>they should always</b> wash hands before a delivery?                                                              |                                         |                            |
| N3A                                                                                                                                                                                                                                                                                                    | Think about birth attendants in Zanzibar. Out of 10, how many do you think do <b>always wash</b> hands before a delivery?                                               |                                         |                            |
| N3B                                                                                                                                                                                                                                                                                                    | Think about <b>in-charge(s)</b> in Zanzibar. Out of 10, how many do you think do <b>always wash</b> hands before a delivery?                                            |                                         |                            |
| N1B                                                                                                                                                                                                                                                                                                    | In a situation when you are working alone with multiple women to assist.<br>Do you think <b>it is OK to not</b> wash your hands before a delivery in this circumstance? | Never<br>(1)                            | Not usually<br>(2)         |
| N2B                                                                                                                                                                                                                                                                                                    | Out of these 10, how many birth attendants thought <b>it is never OK to</b> wash hands when they are working alone and assisting multiple women?                        |                                         |                            |
| N4A                                                                                                                                                                                                                                                                                                    | In the past month, have <b>you</b> reminded anyone to wash hands?                                                                                                       | (1) Yes<br>(2) No<br>(3) Don't remember |                            |
| N4B                                                                                                                                                                                                                                                                                                    | In the past month, has <b>anyone</b> reminded you to wash hands?                                                                                                        | (1) Yes<br>(2) No<br>(3) Don't remember |                            |
| N4C                                                                                                                                                                                                                                                                                                    | In the past month In the past month have you seen or heard that <b>the ward manager</b> reminded anyone to wash hands?                                                  | (1) Yes<br>(2) No<br>(3) Don't remember |                            |
| N4D                                                                                                                                                                                                                                                                                                    | In the past month has <b>any of your colleagues</b> reminded anyone to wash hands?                                                                                      | (1) Yes<br>(2) No<br>(3) Don't remember |                            |
| <b>Habit</b>                                                                                                                                                                                                                                                                                           |                                                                                                                                                                         |                                         |                            |
| <b>Sometimes at work things come automatically and sometimes you have to remind yourself</b>                                                                                                                                                                                                           |                                                                                                                                                                         | <b>No</b><br>(1)                        | <b>Yes, usually</b><br>(2) |
| H1                                                                                                                                                                                                                                                                                                     | Do you wash your hands before a delivery <b>without thinking</b> ?                                                                                                      |                                         |                            |
| H2                                                                                                                                                                                                                                                                                                     | Do you start hand washing before a delivery <b>without even realising</b> you are doing it?                                                                             |                                         |                            |
| H3A                                                                                                                                                                                                                                                                                                    | Do you ever have to <b>remind yourself</b> to hand wash before a delivery?                                                                                              |                                         |                            |
| <b>"Sometimes if people do things again and again, it becomes automatic and we don't need to think about it anymore. For example, when I first start fasting, I needed to consciously remember to not eat, but after a few days, I did it automatically without even thinking. Do you understand?"</b> |                                                                                                                                                                         |                                         |                            |
| H3B                                                                                                                                                                                                                                                                                                    | In a situation when you are working alone with multiple women to assist.<br>Do you <b>automatically</b> wash hands before a delivery?                                   |                                         |                            |

| Intention                                                                                                                                     |                                                                                                                                               |     |                 |
|-----------------------------------------------------------------------------------------------------------------------------------------------|-----------------------------------------------------------------------------------------------------------------------------------------------|-----|-----------------|
| “Remember, there are no “good” or “bad” answers - we would like you to answer honestly. Your personal answers will not be shared with anyone” |                                                                                                                                               | No  | Yes,<br>usually |
|                                                                                                                                               |                                                                                                                                               | (1) | (2)             |
|                                                                                                                                               |                                                                                                                                               |     | Yes,<br>always  |
|                                                                                                                                               |                                                                                                                                               |     | (3)             |
| S1                                                                                                                                            | Do you intend to wash your hands before every delivery?                                                                                       |     |                 |
| S2                                                                                                                                            | Do you expect to wash your hands before every delivery when you are working alone?                                                            |     |                 |
| S3                                                                                                                                            | Do you plan to wash your hands before a delivery when the birth is very fast (woman rushed into the labour room and the head is on perineum)? |     |                 |

| Knowledge                                                                                |                                                                                                                                                           |                                                                                                                                                                                                                |                |                                     |
|------------------------------------------------------------------------------------------|-----------------------------------------------------------------------------------------------------------------------------------------------------------|----------------------------------------------------------------------------------------------------------------------------------------------------------------------------------------------------------------|----------------|-------------------------------------|
| I am going to read you some statements, and I will ask you if you agree with them or not |                                                                                                                                                           | Agree a lot                                                                                                                                                                                                    | Agree a little | Disagree a little<br>Disagree a lot |
|                                                                                          |                                                                                                                                                           | (1)                                                                                                                                                                                                            | (2)            | (3) (4)                             |
| K1                                                                                       | Before a delivery, rubbing hands with hand gel is <b>not as effective</b> as water and soap at disinfecting. Do you agree or disagree? A little or a lot? |                                                                                                                                                                                                                |                |                                     |
| K2                                                                                       | When your hands touch very briefly the <b>trolley</b> , they <b>cannot</b> pick up germs. Do you agree or disagree? A little or a lot?                    |                                                                                                                                                                                                                |                |                                     |
| K3                                                                                       | When your hands touch very briefly the <b>Macintosh or kanga</b> , they <b>can</b> pick up germs. Do you agree or disagree? A little or a lot?            |                                                                                                                                                                                                                |                |                                     |
| K4                                                                                       | Hand gel dries off in                                                                                                                                     | (1) Less than 10 seconds<br>(2) between 10 and 20 seconds<br>(3) between 20 and 60 seconds                                                                                                                     |                |                                     |
| K5                                                                                       | Please demonstrate the appropriate hand washing technique and duration                                                                                    | Record if she shows:<br><input type="checkbox"/> Behind fingers<br><input type="checkbox"/> Thumbs<br><input type="checkbox"/> Interlocking fingers (nail-fingers in Swahili)<br><input type="checkbox"/> Palm |                |                                     |
| K6                                                                                       |                                                                                                                                                           | Duration in seconds:<br>1) Less than 10<br>2) 10+                                                                                                                                                              |                |                                     |
| K7                                                                                       | Which one takes longer: hand washing or hand rubbing?                                                                                                     | (1) Hand washing<br>(2) Hand rubbing<br>(3) Don't know                                                                                                                                                         |                |                                     |

*Take a couple minutes break*

Sometimes birth attendants touch unsterile objects like the register or the phone before a delivery. I want to ask you some questions about this.

| Experiential attitudes                                                                   |                                                                                                                                                                                                            |             |                |                                     |
|------------------------------------------------------------------------------------------|------------------------------------------------------------------------------------------------------------------------------------------------------------------------------------------------------------|-------------|----------------|-------------------------------------|
|                                                                                          |                                                                                                                                                                                                            | No          | Yes - A little | Yes - A lot                         |
|                                                                                          |                                                                                                                                                                                                            | (1)         | (2)            | (3)                                 |
| A7                                                                                       | When you briefly touch the <b>register, pen, or phone</b> after putting on gloves, do you feel your hands are too dirty to conduct a delivery?                                                             |             |                |                                     |
| A8                                                                                       | In a situation when you are working alone with multiple women to assist. Do you feel <b>anxious</b> when you briefly touch a <b>register, pen, or phone</b> after putting on gloves to conduct a delivery? |             |                |                                     |
| A9                                                                                       | Do you feel <b>proud of completing things</b> (kufanikisha) when you avoid touching unsterile objects before conducting a delivery?                                                                        |             |                |                                     |
| Instrumental attitudes                                                                   |                                                                                                                                                                                                            |             |                |                                     |
| I am going to read you some statements, and I will ask you if you agree with them or not |                                                                                                                                                                                                            | Agree a lot | Agree a little | Disagree a little<br>Disagree a lot |

|    |                                                                                                                                                                   | (1) | (2) | (3) | (4) |
|----|-------------------------------------------------------------------------------------------------------------------------------------------------------------------|-----|-----|-----|-----|
| I6 | Touching a <b>register, pen, or phone</b> just before cord-cutting will cause an infection to the newborn. Do you agree or disagree? A little or a lot?           |     |     |     |     |
| I7 | Avoiding touching a <b>kanga or Macintosh</b> before touching a woman's vagina will prevent her a serious infection. Do you agree or disagree? A little or a lot? |     |     |     |     |
| I8 | My hands are gloved and I am ready to perform a delivery. If I wash my hands again every time I touch a Macintosh or kanga I do not get any work done.            |     |     |     |     |
| I9 | If I touch a <b>pen or phone or register</b> before touching a woman's vagina, I will get reprimanded.                                                            |     |     |     |     |

| Perceived control/Self-efficacy |                                                                                                                                                            |     |     |     |  |
|---------------------------------|------------------------------------------------------------------------------------------------------------------------------------------------------------|-----|-----|-----|--|
|                                 |                                                                                                                                                            | Ve  | A   | N   |  |
|                                 | BEFORE A DELIVERY                                                                                                                                          | (1) | (2) | (3) |  |
| C5                              | How sure are you that you will (can) avoid touching unsterile objects <b>when the delivery equipment is in various places?</b>                             |     |     |     |  |
| C6                              | How sure are you that you will (can) avoid touching unsterile objects <b>when you are working alone?</b>                                                   |     |     |     |  |
| C7                              | How sure are you that you will (can) avoid touching unsterile objects <b>when you are responsible for assisting multiple women at second stage labour?</b> |     |     |     |  |

| Social Influence and social norms                                               |                                                                                                                                                                                                                        | Never   | Sometimes | Often              |
|---------------------------------------------------------------------------------|------------------------------------------------------------------------------------------------------------------------------------------------------------------------------------------------------------------------|---------|-----------|--------------------|
|                                                                                 |                                                                                                                                                                                                                        | (1)     | (2)       | (3)                |
| N5A                                                                             | Do you think you <b>can</b> touch unsterile objects just after putting on gloves for a delivery?                                                                                                                       |         |           |                    |
| <i>We recently asked 10 birth attendants in Zanzibar the previous question.</i> |                                                                                                                                                                                                                        |         |           |                    |
| N6A                                                                             | Out of these 10, how many birth attendants thought <b>they should never</b> touch unsterile objects after putting on gloves for a delivery?                                                                            |         |           |                    |
| N7A                                                                             | Think about birth attendants in Zanzibar. Out of 10, how many <b>never touch</b> unsterile objects after putting on gloves for a delivery?                                                                             |         |           |                    |
| N7B                                                                             | Think about <b>in-charge(s)</b> in Zanzibar. Out of 10, how many <b>never touch</b> unsterile objects after putting on gloves for a delivery?                                                                          |         |           |                    |
| <b>In a situation when you are working alone with multiple women to assist.</b> |                                                                                                                                                                                                                        | Never   | Sometimes | Often              |
| N5B                                                                             | Do you think <b>it is OK</b> to touch unsterile objects just after putting on gloves for a delivery in this circumstance?                                                                                              | (1)     | (2)       | (3)                |
| <i>We recently asked 10 birth attendants in Zanzibar the previous question.</i> |                                                                                                                                                                                                                        |         |           |                    |
| N6B                                                                             | Out of these 10, how many birth attendants thought <b>they should never</b> touch unsterile objects after putting on gloves for a delivery, when they are <b>working alone and they are assisting multiple women</b> ? |         |           |                    |
| N8A                                                                             | In the past month have <b>you</b> reminded anyone to not touch unsterile objects after putting gloves on for a delivery?                                                                                               | (1) Yes | (2) No    | (3) Don't remember |
| N8B                                                                             | In the past month has <b>anyone</b> reminded you to not touch unsterile objects after you put your gloves on before a delivery?                                                                                        | (1) Yes | (2) No    | (3) Don't remember |
| N9A                                                                             | In the past month have you seen or heard that <b>the maternity in-charge</b> reminded anyone not to touch unsterile objects?                                                                                           | (1) Yes | (2) No    | (3) Don't remember |
| N9B                                                                             | In the past month has <b>any of your colleagues</b> reminded anyone to not touching unsterile objects?                                                                                                                 | (1) Yes | (2) No    | (3) Don't remember |

| Habit                                                                                        |                                                                                        |     |                                 |                            |
|----------------------------------------------------------------------------------------------|----------------------------------------------------------------------------------------|-----|---------------------------------|----------------------------|
|                                                                                              |                                                                                        | No  | Yes, usually (most of the time) | Yes, always (all the time) |
|                                                                                              |                                                                                        | (1) | (2)                             | (3)                        |
| <b>Sometimes at work things come automatically and sometimes you have to remind yourself</b> |                                                                                        |     |                                 |                            |
| H4                                                                                           | Do you avoid touching unsterile objects before a delivery <b>without thinking</b> ?    |     |                                 |                            |
| H5                                                                                           | Do you avoid touching unsterile objects before a delivery <b>without realising</b> it? |     |                                 |                            |

|    |                                                                                                                                                                                                                                                                                                          |  |  |  |
|----|----------------------------------------------------------------------------------------------------------------------------------------------------------------------------------------------------------------------------------------------------------------------------------------------------------|--|--|--|
| H6 | Do you need to <b>remind yourself</b> to avoid touching unsterile objects before a delivery?                                                                                                                                                                                                             |  |  |  |
|    | <b>“Sometimes if people do things again and again, it becomes automatic and we don’t need to think about it anymore. For example, when I first started fasting, I needed to consciously remember to not eat, but after a few days, I did it automatically without even thinking. Do you understand?”</b> |  |  |  |
| H7 | <b>In a situation when you are working alone with multiple women to assist.</b><br>Do you <b>automatically</b> avoid touching unsterile objects before a delivery?                                                                                                                                       |  |  |  |

| Intention                                                                                                                                            |                                                                                                                                                            |     |              |             |
|------------------------------------------------------------------------------------------------------------------------------------------------------|------------------------------------------------------------------------------------------------------------------------------------------------------------|-----|--------------|-------------|
| <b>“Remember, there are no “good” or “bad” answers - we would like you to answer honestly. Your personal answers will not be shared with anyone”</b> |                                                                                                                                                            | No  | Yes, usually | Yes, always |
|                                                                                                                                                      |                                                                                                                                                            | (1) | (2)          | (3)         |
| S4                                                                                                                                                   | Do you intend to avoid touching unsterile objects before a delivery?                                                                                       |     |              |             |
| S5                                                                                                                                                   | Do you expect to avoid touching unsterile objects before a delivery when you are working alone?                                                            |     |              |             |
| S6                                                                                                                                                   | Do you plan to avoid touching unsterile objects before a delivery when the birth is very fast (woman rushed into the labour ward and head is on perineum)? |     |              |             |

| THE END                                                                    |  |  |  |  |
|----------------------------------------------------------------------------|--|--|--|--|
| Do you have any comments or questions after completing this questionnaire? |  |  |  |  |

**Thank you for your participation in this study and for completing this questionnaire!**

| QUESTIONS FOR INTERVIEWER |                                                                                                                                                      |        |  |
|---------------------------|------------------------------------------------------------------------------------------------------------------------------------------------------|--------|--|
| Q1                        | Is there any reason for you to believe that the respondent did not understand the answer categories? [If yes, explain what caused you to think this] | (1)    |  |
|                           |                                                                                                                                                      | Yes    |  |
|                           |                                                                                                                                                      | Why?   |  |
|                           |                                                                                                                                                      | (2) No |  |

## Supplementary C – selection of modifiable determinants

**Table 1 – List of modifiable exposures**

| Variable                                                 | Questionnaire reference/Observation tool | How it was measured          |
|----------------------------------------------------------|------------------------------------------|------------------------------|
| <b>Both outcomes</b>                                     |                                          |                              |
| 1. Attended supportive supervision in the last 3 months  | Questionnaire – F4                       | Categorical response options |
| 2. Hand hygiene refresher training in the past 12 months | Questionnaire – F3                       | Categorical response options |

|                  |                                            |                                                                                                 |                                                                                                                                                                    |
|------------------|--------------------------------------------|-------------------------------------------------------------------------------------------------|--------------------------------------------------------------------------------------------------------------------------------------------------------------------|
| 3.               | Instrumental beliefs (scenario)            | Questionnaire – I1B                                                                             | Binary response option                                                                                                                                             |
| 4.               | Delivery equipment type used               | Observation – collected at the time of delivery                                                 | Categorical response options                                                                                                                                       |
| 5.               | Workload (number of procedures per minute) | Observation – procedures collected throughout observation as they happen                        | Composite variable described in manuscript methods section                                                                                                         |
| 6.               | Presence of the in charge                  | Observation – collected at the beginning of every observation session; updates after it changes | Categorical response options                                                                                                                                       |
| <b>Outcome 1</b> |                                            |                                                                                                 |                                                                                                                                                                    |
| 1.               | Availability of single-use drying material | Observation – collected at the beginning of every observation session; updates after it changes | Categorical response options                                                                                                                                       |
| 2.               | Availability of gloves                     | Observation – collected at the beginning of every observation session; updates after it changes | Categorical response options                                                                                                                                       |
| 3.               | Necessary hand hygiene equipment           | Observation – collected at the beginning of every observation session; updates after it changes | Composite variable made of three individual items with categorical response options: availability of water & soap, or gel. Described in manuscript methods section |
| 4.               | Knowledge – technique demonstration        | Questionnaire – K5                                                                              | Number of all technique items when demonstrating handwashing                                                                                                       |
| 5.               | Knowledge – duration demonstration         | Questionnaire – K6                                                                              | Binary response option                                                                                                                                             |
| 6.               | Habit                                      | Questionnaire – H1, H2, H3A, H3B                                                                | Likert scale response                                                                                                                                              |
| 7.               | Self-efficacy                              | Questionnaire – C1, C2, C3, C4                                                                  | Likert scale response                                                                                                                                              |
| 8.               | Experiential attitudes                     | Questionnaire – A2, A3, A4, A5, A6                                                              | Likert scale response                                                                                                                                              |
| 9.               | Instrumental attitudes                     | Questionnaire – I2, I3, I4, I5                                                                  | Likert scale response                                                                                                                                              |
| 10.              | Injunctive norms                           | Questionnaire – N1A, N2A, N1B, N2B                                                              | N1A – Likert scale<br>N2A – Response out of 10                                                                                                                     |
| 11.              | Descriptive norms                          | Questionnaire – N3A, N3B                                                                        | Response out of 10                                                                                                                                                 |
| 12.              | Reminders                                  | Questionnaire – N4A, N3B, N4C, N4D                                                              | Composite variable made of N4A, N3B, N4C, N4D<br>Individual items have categorical response options. Described in manuscript methods section                       |
| <b>Outcome 2</b> |                                            |                                                                                                 |                                                                                                                                                                    |
| 1.               | Time since donning gloves                  | Observation – automatically logged time once actions are recorded                               | Continuous variable described in manuscript methods section                                                                                                        |
| 2.               | Knowledge                                  | Questionnaire – K2, K3                                                                          | Likert scale response                                                                                                                                              |
| 3.               | Habit                                      | Questionnaire – H4, H5, H6, H7                                                                  | Likert scale response                                                                                                                                              |
| 4.               | Self-efficacy                              | Questionnaire – C5, C6, C7                                                                      | Likert scale response                                                                                                                                              |
| 5.               | Experiential attitudes                     | Questionnaire – A7, A8, A9                                                                      | Likert scale response                                                                                                                                              |
| 6.               | Instrumental attitudes                     | Questionnaire – I6, I7, I8 and I9                                                               | Likert scale response                                                                                                                                              |
| 7.               | Injunctive norms                           | Questionnaire – N5A, N6A, N5B, N6B                                                              | N5A – Likert scale<br>N6A – Response out of 10                                                                                                                     |
| 8.               | Descriptive norms                          | Questionnaire – N7A, N7B                                                                        | Out of 10 response                                                                                                                                                 |
| 9.               | Reminders                                  | Questionnaire – N8A, N8B, N9A, N9B                                                              | Composite variable made of N8A, N8B, N9A, N9B                                                                                                                      |

Individual items have categorical response options.

**Table 2 - Excluded variables and reason for exclusion**

| Variable                                             | Reason for exclusion                                                                                                                                    |
|------------------------------------------------------|---------------------------------------------------------------------------------------------------------------------------------------------------------|
| <b>Both outcomes</b>                                 |                                                                                                                                                         |
| Attended supportive supervision in the last 3 months | Limited distribution in sample 93.2% (n=726) did not attend supervision                                                                                 |
| Delivery equipment type used                         | Only related to delivery variable. Insufficient deliveries (N=170) in the dataset                                                                       |
| Presence of in-charge                                | Limited distribution in sample; in 90.8% (n=708) in-charge was not present.                                                                             |
| <b>Outcome 1</b>                                     |                                                                                                                                                         |
| Availability of gloves                               | Limited distribution in sample; 96.5% (752) had gloves                                                                                                  |
| Necessary hand hygiene equipment                     | Limited distribution in sample; 90.4% (704) had the necessary equipment                                                                                 |
| Knowledge – technique demonstration                  | Knowledge – duration was chosen instead.                                                                                                                |
| Injunctive norms                                     | N1A - Limited distribution in sample; 85% responded <i>always</i> .<br>N2A - Limited distribution in sample; 85% responded <i>10/10 colleagues</i>      |
| <b>Outcome 2</b>                                     |                                                                                                                                                         |
| Knowledge                                            | K2 – Concerns about the interpretation of this question. K3 seemed a better choice.<br>K3 – Limited distribution in sample; 95.7% agreed with statement |
| Injunctive norms                                     | N5A - Limited distribution in sample; 93% responded <i>never</i><br>N6A - Limited distribution in sample - 58% responded <i>10/10 colleagues</i>        |

**Table 3 – Psychological constructs construction; excluded variables based on internal reliability or direction of association**

| Construct              | Reason for exclusion of particular item                     | Scale Cronbach's alpha | If scale could not be constructed, what was the reason?                                                                                                                                                                                                                         |
|------------------------|-------------------------------------------------------------|------------------------|---------------------------------------------------------------------------------------------------------------------------------------------------------------------------------------------------------------------------------------------------------------------------------|
| <b>Outcome 1</b>       |                                                             |                        |                                                                                                                                                                                                                                                                                 |
| Self-efficacy          | No items excluded                                           | 0.68                   | Not applicable                                                                                                                                                                                                                                                                  |
| Experiential attitudes | A3 had poor spread                                          | 0.31                   | Low internal reliability, possibly due to formulation of items. Dropping individual items would have lowered Alpha even further. Although items A2, A5, A6 intended as reverse-scored, lack of inverse correlation indicated that A5 had not been understood as reverse-scored. |
| Instrumental attitudes |                                                             | 0.27                   | Low internal reliability. I4 only was intended to be scored in the opposite direction from the other three items, but in fact I3 scores also had inverse correlations with I2 and I5. Dropping I3 would not increase overall Alpha sufficiently (only achieving 0.31).          |
| Habit                  | Excluded H3A, as its intended reverse scoring did not work. | 0.71                   | Not applicable                                                                                                                                                                                                                                                                  |
| <b>Outcome 2</b>       |                                                             |                        |                                                                                                                                                                                                                                                                                 |

|                        |                                                                                              |                                      |                                                                                                       |
|------------------------|----------------------------------------------------------------------------------------------|--------------------------------------|-------------------------------------------------------------------------------------------------------|
| Experiential attitudes | A9 was excluded as it had poor spread. Its removal increased the alpha from an initial 0.58. | 0.77 for scale with A7 and A8 alone. | Not applicable                                                                                        |
| Instrumental attitudes | Not applicable                                                                               | 0.13                                 | Low internal reliability. Removing any of the items would not have improved the result substantially. |
| Self-efficacy          | Not applicable                                                                               | 0.76                                 | Not applicable                                                                                        |
| Habit                  | Removed item H6, as the intended reverse scoring did not work.                               | 0.71                                 | Not applicable                                                                                        |

## Supplementary D – Sensitivity analyses

**Table 1 – Sensitivity 1 – Remove pilot facility from Model 1**

| Variable name                                                | Adjusted odds ratio* (95% CI)<br>N=727** |
|--------------------------------------------------------------|------------------------------------------|
| <b>Workload***</b>                                           |                                          |
| Highest                                                      | 1                                        |
| High                                                         | 1.42 (0.58-3.48)                         |
| Medium                                                       | 4.20 (1.85-9.52)                         |
| Low                                                          | 1.94 (0.80-4.67)                         |
| Lowest                                                       | 31.10(13.44-71.99)                       |
| <b>Availability of single use drying material</b>            |                                          |
| No                                                           | 1                                        |
| Yes                                                          | 3.19 (1.76-5.78)                         |
| <b>Knowledge (duration)</b>                                  |                                          |
| Less than 10 seconds                                         | 1                                        |
| 10 seconds or more                                           | 1.71(0.90-3.25)                          |
| <b>Habit°</b>                                                | 1.09 (0.96-1.24)                         |
| <b>Instrumental beliefs</b>                                  |                                          |
| Does not mention HH                                          | 1                                        |
| Mentions HH                                                  | 1.26 (0.64-2.48)                         |
| <b>Perceived control°</b>                                    | 0.94 (0.83-1.07)                         |
| <b>Descriptive norms (colleagues)°</b>                       | 1.11(0.89-1.39)                          |
| <b>Descriptive norms (managers)°</b>                         | 0.94 (0.80-1.10)                         |
| <b>Reminders°</b>                                            | 1.18 (0.97-1.45)                         |
| <b>Hand hygiene refresher training in the past 12 months</b> |                                          |
| No                                                           | 1                                        |
| Yes                                                          | 1.72 (0.93-3.18)                         |

\*Each odds ratio is adjusted for all other variables in the table

\*\*Compared to Model 1 in the manuscript, 24 observations were not included from model because they belong to the pilot facility which has 12 events.

\*\*\*Workload was constructed as the number of procedures per minute: 0.3590-1.7647 (highest); 0.2010-0.3589 (high); 0.1129-0.2009 (medium); 0.0502-0.1128 (low); 0-0.0501 (lowest)

°Variables included in the model as linear terms. Reported OR for these variables refers to one unit increase.

**Table 2 – Sensitivity Model 1 and 2 with a different measure of workload (i.e., the number of procedures in the fifteen minutes preceding the index procedure)**

| <b>Hand rubbing/washing (Model 1)</b>                                           |                                                  |
|---------------------------------------------------------------------------------|--------------------------------------------------|
| <b>Variable name</b>                                                            | <b>Adjusted odds ratio* (95% CI)<br/>N=629**</b> |
| <b>Workload (procedures number in 15 minutes preceding the index procedure)</b> |                                                  |
| 2 or more                                                                       | 1                                                |
| 1                                                                               | 9.00 (3.18-25.47)                                |
| 0                                                                               | 21.7 (8.31-56.44)                                |
| <b>Availability of single use drying material</b>                               |                                                  |
| No                                                                              | 1                                                |
| Yes                                                                             | 1.77 (0.93-0.23)                                 |
| <b>Knowledge (duration)</b>                                                     |                                                  |
| Less than 10 seconds                                                            | 1                                                |
| 10 seconds or more                                                              | 2.17 (1.15-4.12)                                 |
| <b>Habit°</b>                                                                   | 1.08 (0.94-1.23)                                 |
| <b>Instrumental beliefs</b>                                                     |                                                  |
| Does not mention HH                                                             | 1                                                |
| Mentions HH                                                                     | 1.23 (0.62-2.59)                                 |
| <b>Perceived control°</b>                                                       | 0.95 (0.83-1.09)                                 |
| <b>Descriptive norms (colleagues)°</b>                                          | 1.17(0.93-1.45)                                  |
| <b>Descriptive norms (managers)°</b>                                            | 0.91 (0.76-1.06)                                 |
| <b>Reminders°</b>                                                               | 1.17 (0.96-1.42)                                 |
| <b>Hand hygiene refresher training in the past 12 months</b>                    |                                                  |
| No                                                                              | 1                                                |
| Yes                                                                             | 1.79 (0.96-3.37)                                 |

\*Each odds ratio is adjusted for all other variables in the table

\*\*Compared to Model 1 in the manuscript, 122 observations were not included in the model because they did not have a period of 15 minutes preceding them.

°Variables included in the model as linear terms. Reported OR for these variables refers to one unit increase.

| <b>Avoiding glove recontamination (Model 2)</b>                                 |                                                  |
|---------------------------------------------------------------------------------|--------------------------------------------------|
| <b>Variable name</b>                                                            | <b>Adjusted odds* ratio (95% CI)<br/>N=386**</b> |
| <b>Time since donning gloves</b>                                                |                                                  |
| 3 or more minutes                                                               | 1                                                |
| 2-3 minutes                                                                     | 0.76 (0.30-1.90)                                 |
| 1-2 minutes                                                                     | 1.30 (0.60-2.80)                                 |
| Less than a minute                                                              | 4.84 (2.52-9.29)                                 |
| <b>Workload (procedures number in 15 minutes preceding the index procedure)</b> |                                                  |
| 2 or more                                                                       | 1                                                |
| 1                                                                               | 1.70 (0.72-4.04)                                 |
| 0                                                                               | 0.95 (0.45-2.02)                                 |
| <b>Habit°</b>                                                                   | 1.02 (0.91-1.15)                                 |
| <b>Experiential attitudes</b>                                                   |                                                  |
| Mixed responses                                                                 | 1                                                |
| Always responded yes a lot                                                      | 0.99 (0.46-2.16)                                 |
| <b>Instrumental beliefs</b>                                                     |                                                  |
| Does not mention HH                                                             | 1                                                |
| Mentions HH                                                                     | 1.18 (0.61-2.28)                                 |
| <b>Perceived control°</b>                                                       | 0.97 (0.86-1.10)                                 |

|                                                              |                  |
|--------------------------------------------------------------|------------------|
| <b>Descriptive norms (colleagues)<sup>°</sup></b>            | 1.01 (0.82-1.23) |
| <b>Descriptive norms (managers)<sup>°</sup></b>              | 0.88 (0.74-1.05) |
| <b>Reminders<sup>°</sup></b>                                 | 0.99 (0.82-1.19) |
| <b>Hand hygiene refresher training in the past 12 months</b> |                  |
| No                                                           | 1                |
| Yes                                                          | 1.08 (0.57-2.02) |

\*Each odds ratio is adjusted for all other variables in the table

\*\*Compared to Model 2 in the manuscript, 99 observations were not included here because they did not have a period 15 minutes preceding them.

<sup>°</sup>Variables included in the model as linear terms. Reported OR for these variables refers to one unit increase.
